# Supplementary material for: Facile Cl−-mediated hydrothermal synthesis of large-scale Ag nanowires from AgCl hydrosol
Source: Royal Society of Chemistry journal article supplement (doi:10.1039/c3ce26925f), 2013-01-01
Supplement: c3ce26925f.pdf [file c3ce26925f.pdf]

## Electronic supplementary information

---

# Facile Cl<sup>-</sup>-mediated hydrothermal synthesis of large-scale Ag nanowires from AgCl hydrosol

Wenlong Yang, Jingjing Li, Yijun Zhong, Haisheng Qian, Zhengquan Li, and Yong Hu\*

### Characterization:

Powder X-ray diffraction (XRD) measurement of the samples was performed with a Philips PW3040/60 X-ray diffractometer using Cu K $\alpha$  radiation at a scanning rate of 0.06 deg s<sup>-1</sup>. Scanning electron microscope (SEM) was performed with a Hitachi S-4800 scanning electron micro-analyzer with an accelerating voltage of 15 kV. Transmission electron microscope (TEM) and high-resolution transmission electron microscope (HRTEM) were conducted at 200 kV with a JEM-2100F field-emission TEM. The absorption spectra were measured using a PerkinElmer Lambda 900 UV-vis spectrophotometer at room temperature.

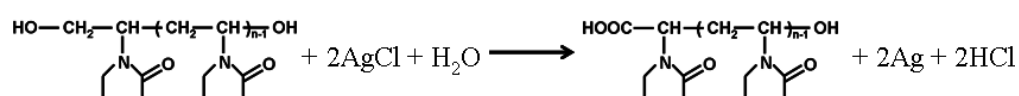

**Scheme S1.** Formulas of PVP structural changes involved in the oxidation by AgCl hydrosol.

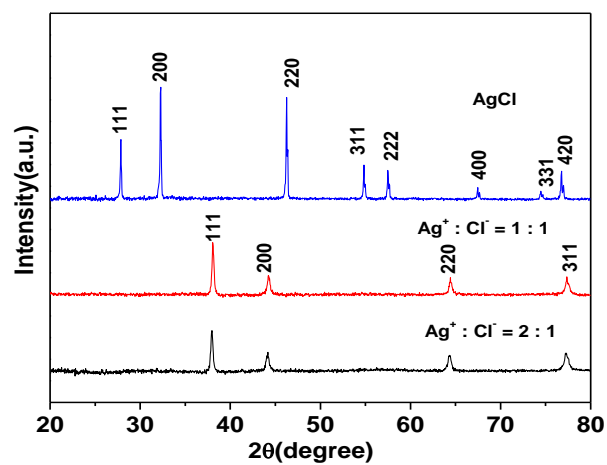

**Fig. S1** XRD patterns of (a) AgCl particles obtained in the absence of PVP, (b) and (c) Ag nanostructures obtained with the different concentrations of NaCl.
